# Supplementary material for: High-resolution ensemble projections and uncertainty assessment of regional climate change over China in CORDEX East Asia
Source: Copernicus journal article supplement (doi:10.5194/hess-2017-407), 2017-09-11
Supplement: Supplementary file [file hess-2017-407-AC1-supplement.pdf]

# REPLIES TO THE REVIEWERS' COMMENTS

The authors are grateful to the reviewers for their valuable comments that helped to improve the quality of the manuscript. The point-by-point responses are presented as follows:

## **Reviewer #1**

1. This paper reports a useful analysis of model simulations and forecasts of temperature and precipitation over China. Yet the presentation needs improving by avoiding vague and empty statements and the English needs polishing before the paper is publishable.

Response: Thanks for your comments and suggestions. We tried our best to revise the manuscript according to your advices. Hopefully, this revised version will be satisfactory to meet the publication standard.

2. Section 2, Data and methods lacks details. Why selecting these five RCMs? What advantages do they have compared to other regional and global models products? Do the five models have desired features for the purpose of this analysis?

Response: Thanks for your suggestions. Data and methods in section 2 have been modified in the revision. The reason why five RCMs are selected is below:

The selected five RCMs have been demonstrated to have abilities to reasonably reproduce the regional climate over East Asia and have been used for modeling and predicting extreme climate as well as investigating physical processes of East Asia climate (Cha and Lee, 2009; Cha et al., 2011; Hong and Yhang, 2010; Park et al., 2008; Yhang and Hong, 2008). Moreover, the five RCMs used in this work are derived from the CORDEX East Asia experiment that is able to provide a common framework in a global-wide perspective for regional climate projections in order to understand their uncertainties as well as provide model evaluation.

3. CRU and APHRO products are used as “observations”. Are they more accurate and reliable than other global temperature and precipitation data products over the study domain (China)?

Response: Thanks. We use the temperature data from CRU and precipitation data from APHRO as the observation climate in this study. Some illustrations about CRU and APHRO products and the reason why they are used in this study are clarified as below:

Some studies have focused on comparing and evaluating the spatio-temporal similarities and differences of several widely used observed gridded datasets over China (Sun et al., 2014; Wu and Gao, 2013; Yin et al., 2015). Table 1 shows the information of several widely used global observed gridded climate datasets (from Sun et al., 2014). According to Sun et al (2014), all temperature datasets in table 1 exhibit similar distribution patterns for the annual

35 average temperature in mainland China. Considering its easier access and wider usage in  
 36 evaluation of RCM model used in East Asian/China (Wang et al., 2017), CRU other than  
 37 UDEL temperature data are used to evaluate the performance of RCM in this study.

38 Table 1 Detailed information on the datasets in the research of Sun et al (2014)

| Dataset | Pre | Tas | Spatial domain   | Temporal domain    | Reference                     |
|---------|-----|-----|------------------|--------------------|-------------------------------|
| APHRO   | √   |     | 0.25°, East Asia | Daily, 1951-2007   | (Yatagai et al., 2012)        |
| CRU     | √   | √   | 0.5°, global     | Monthly, 1901-2017 | (New et al., 2000)            |
| GPCC    | √   |     | 0.5°, global     | Monthly, 1901-2010 | (Becker et al., 2013)         |
| UDEL    | √   | √   | 0.5°, global     | Monthly, 1901-2010 | (Willmott and Matsuura, 2001) |

39  
 40 Sun et al (2014) suggest that observed precipitation coming from different datasets do  
 41 have differences, which are caused by differences in raw data sources, quality control  
 42 schemes, orographic correction and interpolation techniques. Indeed, we have no ability to  
 43 know the ‘truth value’. To some degree, the dataset constructed based on observations from  
 44 more meteorological stations can be treated as more accurate and reliable one. Among the  
 45 several precipitation datasets shown in table 1, APHRO’s daily gridded precipitation,  
 46 presently the only long-term, continental-scale, high-resolution daily product, is constructed  
 47 based on data collected at 5000-12000 stations, which represent 2.3-4.5 times the data made  
 48 available through the Global Telecommunication System network used for generating global  
 49 gridded dataset (i.e. CRU, GPCC and UDEL) (Yatagai et al., 2012). Thus, the APHRO  
 50 dataset would give more confidence in the robustness of the results in comparison with other  
 51 global precipitation datasets and thus is widely used for evaluating the performance of RCM  
 52 in East Asia (Gao et al., 2017; Kumar and Dimri, 2017; Lau et al., 2017; Lee et al., 2017; Um  
 53 et al., 2017).

54 4. Section 2.3 is somewhat confusing due to lack of details. Why using Taylor diagram? A  
 55 concise description of the Taylor diagram is needed for those who are not familiar with the  
 56 method.

57 Response: Thanks. Detailed illustration for Taylor diagram has been added in the revised  
 58 manuscript.

59 The Taylor diagram was designed to quantify the degree of correspondence between the  
 60 modeled and observed behavior by plotting a 2D graph with three statistics (Pearson  
 61 correlation coefficient (R), standard deviation (SD), and the root-mean-square error (RMSE)).  
 62 In the Taylor diagram, a smaller distance between the observation and the compared models  
 63 means a closer agreement (Baker and Taylor, 2016; Sun et al., 2015; Taylor, 2001). More  
 64 details about this diagram are available from the above references. In general, The Taylor  
 65 diagram enable statistics for different fields (with different units) to show in a single plot,  
 66 facilitating the comparative assessment of different models.

67 5. Eqs. (4)-(5) appear to come from nowhere with undefined notations. A justification of the  
68 statistical method and metrics used in the analysis is helpful.

69 Response: Thanks. More details about notations in Eqs. (4)-(5) and methods (where Eqs.  
70 (4)-(5) are included) to separate and quantify the two sources of uncertainty were added in the  
71 revised manuscript. Here we give a brief illustration.

72 (1) Firstly, the percentage change from the mean of 1980-1999 is calculated for each  
73 projection, and a smooth fourth-order polynomial is fitted for 2030-2049. Then the raw  
74 simulation of each model  $X_{m,t}$  for the model  $m$  and year  $t$  which can be expressed by

$$X_{m,t} = x_{m,t} + c_m + \varepsilon_{m,t} \quad (\text{Eqs. 1})$$

75 where the smooth fit is represented by  $x_{m,t}$ , the reference data is denoted by  $c_m$ , and the  
76 residual is denoted by  $\varepsilon_{m,t}$ .

77 **The internal variability** is represented by the decadal mean residuals from these smooth fits  
78 for 2030-2049, which is assumed to be constant with lead time.

79 **The model uncertainty** is considered by the model spread around the mean for each  
80 scenario.

81 (2) The RCMs are weighted by their performance in simulating the current climate from  
82 the mean of 1980-1999, up to the year 1999. Thus, each model is weighted according to

$$w_m = \frac{1}{x_{obs} + |x_{m,1999} - x_{obs}|} \quad (\text{Eqs. 2})$$

83 where  $x_{m,1999}$  is the model climate changes at the year of 1999, relative to 1980-1999, and  $x_{obs}$   
84 is an observational estimate derived from fitting a similar fourth-order polynomial to the  
85 observations. The normalized quantities of these weightings can be expressed as

$$W_m = \frac{w_m}{\sum_m w_m} \quad (\text{Eqs. 3})$$

86 (3) **The internal variability** (equ. 4) is defined as the multi-model mean of these  
87 variance of the residuals from the fits for each model. Here  $\text{var}_t(\cdot)$  indicates the variance  
88 across different time slices.

$$V = \sum_m W_m \text{var}_t(\varepsilon_m, t) \quad (\text{Eqs. 4})$$

90 (4) **The intermodel variability** (equ.5) is estimated from the weighted variance (var<sup>w</sup>) in  
91 the different RCM prediction fits ( $x_{m,t}$ ), where  $\text{var}_m(\cdot)$  represents the variance across different  
92 models.

$$M(t) = \text{var}_m^w(x_{m,t}) \quad (\text{Eqs. 5})$$

93 (5) It was assumed that the two sources of uncertainty can be treated independently (i.e.,  
94 there is no interaction between them). Thus, **the total variability**  $V_T$  is:

$$V_T(t) = V + M(t) \quad (\text{Eqs. 6})$$

95 6. Section 3 is not well organized and thought out. Overall, discussions are somewhat  
96 superficial. To make this paper useful, more insightful explanations and suggestions should  
97 be made explicit and specific. For example, on page 6 “All RCMs successfully simulate the  
98 precipitation patterns but with quite large biases in amounts”. Should we trust more the CRU  
99 data or the RCMs simulations?

100 Response: Thanks. We reorganized the Section 3 and included more specific analysis in our  
101 revised manuscript. The response to the question “Should we trust more the CRU data or the  
102 RCMs simulations?” is below:

103 In this paper, we aimed to evaluate the performance of five RCMs within CORDEX-EA  
104 in reproducing present-day climate and to analyze the projected future climate changes under  
105 the middle emission scenario and uncertainties attributed to RCMs and internal variability.  
106 Here the performance of five RCMs in reproducing present-day climate is evaluated by  
107 comparing the RCM simulations with the CRU and APHRO products. The CRU and APHRO  
108 products are constructed based on observed metrological data during historical period. Thus  
109 the CRU and APHRO database can be treated as the proxy for the observed metrological data,  
110 with higher reliability than the RCMs simulations during historical period.

111 7. The authors suggest that “the multi-model ensemble outperforms the individual RCM in  
112 reproducing the observed spatial pattern of precipitation” (page 6). Would it be possible to  
113 obtain the “true” climate by having infinite ensembles?

114 Response: Thanks. It is difficult to obtain the “true” climate by having infinite ensembles so  
115 far. The reason is listed below:

116 The skill of climate models in reproducing precipitation or temperature is limited by  
117 internal atmospheric variability that is largely unpredictable (Kharin and Zwiers, 2002). Thus,  
118 perfect climate model does not exist. Some researchers have concluded the multi-model  
119 ensemble outperforms the individual RCM in reproducing climate pattern (Huttunen et al.,

120 2017; Rozante et al., 2014). Moreover, the probability of obtaining “true” climate would rise  
121 with increased ensemble number. However, huge computational resource is required for the  
122 long-term and high-resolution climate projection. Therefore, to obtain the “true” climate by  
123 having infinite ensembles is difficult so far.

124 8. In section 3.3.2, it was suggested that “the seasonal precipitation change in multi-model  
125 ensemble has larger magnitude and variability than driving GCM. This phenomenon concerns  
126 the significance of the model physics and processes for future climate projection”.  
127 Specification of what model physics and processes are important would be very useful. The  
128 paper ended with “More reliable future climate information could be provided by coupling  
129 GCMs and RCMs through the modifications to model structures and parameters.” To be  
130 specific about the model structures and parameters to be modified would be the valuable new  
131 knowledge that the reader can learn from this analysis.

132 Response: Thanks for your suggestions. The illustrations for important model physics  
133 processes have been added in the revision. They are clarified by two points below:

134 (1) In section 3.3.2, it was suggested that “the seasonal precipitation change in  
135 multi-model ensemble has larger magnitude and variability than driving GCM”. The  
136 configurations of each RCM were showed in Table 2. For each RCM, optimal schemes of the  
137 dynamical and physical processes were determined through the investigation of the model  
138 sensitivities to the schemes. In general, convective parameterization is the most important and  
139 sensitive physical process associated with the simulation results (Huang and Gao, 2017).  
140 Land surface parameterizations, as well as those parameterizations over the ocean, are also  
141 very important because they control the quantity of moisture entering into atmosphere from  
142 the Earth’s surface (Zhao and Li, 2015). Thus, the phenomenon above could be attributed to  
143 the difference in convective parameterization, land surface parameterizations, as well as those  
144 parameterizations over the ocean between GCMs and RCMs. On the other hand, the  
145 discrepancies between the RCMs and driving GCM indicate that the RCM projections are  
146 sensitive to local and regional processes and the methods represented in the model (Diallo et  
147 al., 2012; Saini et al., 2015).

148 (2) At the end of this paper, further research in the future was added: Further research as  
149 for improving the performance of RCM in modeling summer precipitation over South China  
150 and the Tibetan Plateau is needed in the future.

151

**Table 2. RCMs used in this study<sup>a</sup>**

|                 | HadGEM3-RA      | RegCM4      | MM5             | WRF             | RSM         |
|-----------------|-----------------|-------------|-----------------|-----------------|-------------|
| Resolution      | 0.44°           | 50km        | 50km            | 50km            | 50km        |
| Dynamic process | Non-hydrostatic | Hydrostatic | Non-hydrostatic | Non-hydrostatic | Hydrostatic |

|                               |                          |                     |                   |                        |                             |
|-------------------------------|--------------------------|---------------------|-------------------|------------------------|-----------------------------|
| Convective scheme             | Revised mass flux scheme | MIT-Emanuel         | Kain-Fritsch II   | Kain-Fritsch II        | Simplified Arakawa-Schubert |
| Land surface parameterization | MOSES2                   | CLM3                | CLM3              | NOAH                   | NOAH                        |
| Planetary boundary layer      | MOSES2 non-local         | Holtzlag            | YSU               | YSU                    | YSU                         |
| Spectral nudging              | No                       | Yes                 | Yes               | Yes                    | Yes                         |
| Center of research            | MOHC                     | ICTP                | NCAR              | NCAR                   | YSU                         |
| References                    | Davies et al.(2005)      | Giorgi et al.(2012) | Cha and Lee(2009) | Skamarock et al.(2005) | Hong et al.(2013)           |

152 <sup>a</sup>MOSES= Met Office Surface Exchange Scheme, CLM= Community Land Model, NOAH=Noah  
153 Land Surface Model, YSU= Yonsei University scheme, MOHC= The Met Office Hadley Centre,  
154 ICTP= The International Centre for Theoretical Physics, NCAR= National Center for Atmospheric  
155 Research

156 9.The paper needs a careful text editing to improve its presentation. A long sentence is often  
157 confusing such as “Reliable regional future climate projection is important for the evaluation  
158 of climate change impacts and vulnerability, as well as the elaboration of appropriate  
159 mitigation and adaptation measures, especially for the developing countries like China tend to  
160 be one of the most vulnerable to the adverse effects of climate changes” (page 1). English  
161 Grammar needs to checked carefully. For example, “The ongoing coordinated regional  
162 downscaling experiment (CORDEX) (Giorgi et al., 2009; Jones et al., 2011), whose aim to  
163 provide high-resolution regional future climate projections for the majority of populated land  
164 regions on the globe by using multi-RCMs, and an interface to the applicants of the climate  
165 simulations in climate change impact, adaptation, and mitigation studies.” (page 2) is not a  
166 sentence as it does not have a verb.

167 Response: Sorry for the serious language problem in previous manuscript. We consider your  
168 criticism thoroughly in revising manuscript. In total, the previous article was severely  
169 revised four times, particularly on the presentation, interpretation and language together with  
170 the figures and tables. In the revising process, two important co-authors (Prof. W. R. Peltier  
171 from University of Toronto, Toronto, Canada and Prof. Guiling Wang from University of  
172 Connecticut, USA) with proficient English skills contributed to the thorough control check  
173 in language for this version significantly. They read and corrected the language and  
174 presentation for the paper sentence by sentence to meet the reviewers’ request. As you can  
175 see from the track-changes in the main context, tables, and figures, the revised version was  
176 really undergone a major revision through which the paper quality has been improved.

177  
178

179 **Reviewer #2**

180 **Major comments**

181 (1) Introduction. The limitation and development of GCMs are reviewed, but the advantages  
182 and applications of RCMs are not clearly discussed. A more detailed introduction on the  
183 progress and limitation on dynamical downscaling is needed. As mentioned by the authors,  
184 “The CORDEX-EA has been evaluated for simulating the precipitation and temperature over  
185 East Asia (Huang et al., 2015; Jin et al., 2016; Lee and Hong, 2014; Oh et al., 2013; Park et  
186 al., 2013; Suh et al., 2012; Zou et al., 2014).” Therefore, how does this study differ from  
187 previous CORDEX-EA studies should be clearly stated.

188 **Response:** Thanks for your valuable suggestions. More details on the progress and limitation  
189 on dynamical downscaling and the difference between this study and previous CORDEX-EA  
190 studies were added in the revision. Two points are clarified as follows:

191 (1) The resolution of RCMs is approximately 12-50 km, and it accounts for the  
192 sub-GCM grid-scale forcing, e.g. complex topographical features and land cover  
193 heterogeneities in a physically based manner. However, RCMs inherit the biases from  
194 systematic model errors caused by imperfect conceptualization, discretization, and spatial  
195 averaging within grid cells. (Dong et al., 2018). Nonetheless, RCM ensembles enable the  
196 understanding and characterization of uncertainties which have different origins, from the  
197 future scenario, to the forcing data and the regional model physics, and therefore, reduce  
198 uncertainties and increase confidence in future projections.

199 (2) A series of studies based on RCMs within CORDEX-EA have been conducted to  
200 project extreme and mean precipitation and temperature over china under different scenarios  
201 (Niu et al., 2015; Jin et al., 2016; Lee et al., 2014; Park et al., 2016; Tang et al., 2016; Um et  
202 al., 2017), but little attention has been paid to quantify the contributions of the uncertainty  
203 arising from RCMs and internal variability in future climate projection over China. Thus, it is  
204 necessary to objectively evaluate the capability of RCMs and quantify the uncertainty in  
205 future climate projections. In this study, we evaluate the performance of five RCMs within  
206 CORDEX-EA to reproduce present-day climate and to analyze the projected future climate  
207 changes under the middle emission scenario. More importantly, biases in current climate  
208 simulations and uncertainties in future climate projections attributed to the RCMs and internal  
209 variability are further analyzed.

210 (2) Uncertainty quantification method. P5, L5-7. The paper by Hawkins and Sutton (2009,  
211 BAMS) used a model-weighted variance when calculating inter-model variability  $M(t)$ , while  
212 eq. 5 in this paper seemed to get an unweighted value. Given that eq. 4 defined a weighted  
213 mean of variance as  $V$  (same as Hawkins and Sutton’s paper), I suggest keeping it consistent  
214 in the manuscript, because RCM simulations may differ a lot in both magnitude and variation.

215 If the eq. 5 is just a typo and this study does calculate weights for different models, both  
 216 simple multi-model ensemble (MME) and weighted MME should be compared in the  
 217 evaluation (e.g., Figures 2-4).

218 Response: Thanks for your valuable suggestions. Equation 5 was modified and the weighted  
 219 variance was used when calculating the inter-model variability in the revision. As shown in  
 220 the Figures 1-3 in this response file, no significant difference in the spatial patterns (Figures  
 221 1-2) between simple multi-model ensemble (MME) and weighted MME can be found.  
 222 Similarly, skills of the models in reproducing the precipitation and temperature with simple  
 223 MME are nearly consistent with that based on weighted MME (Figure 3). Thus, the weighted  
 224 MME is used in the revised manuscript, instead of the simple MME.

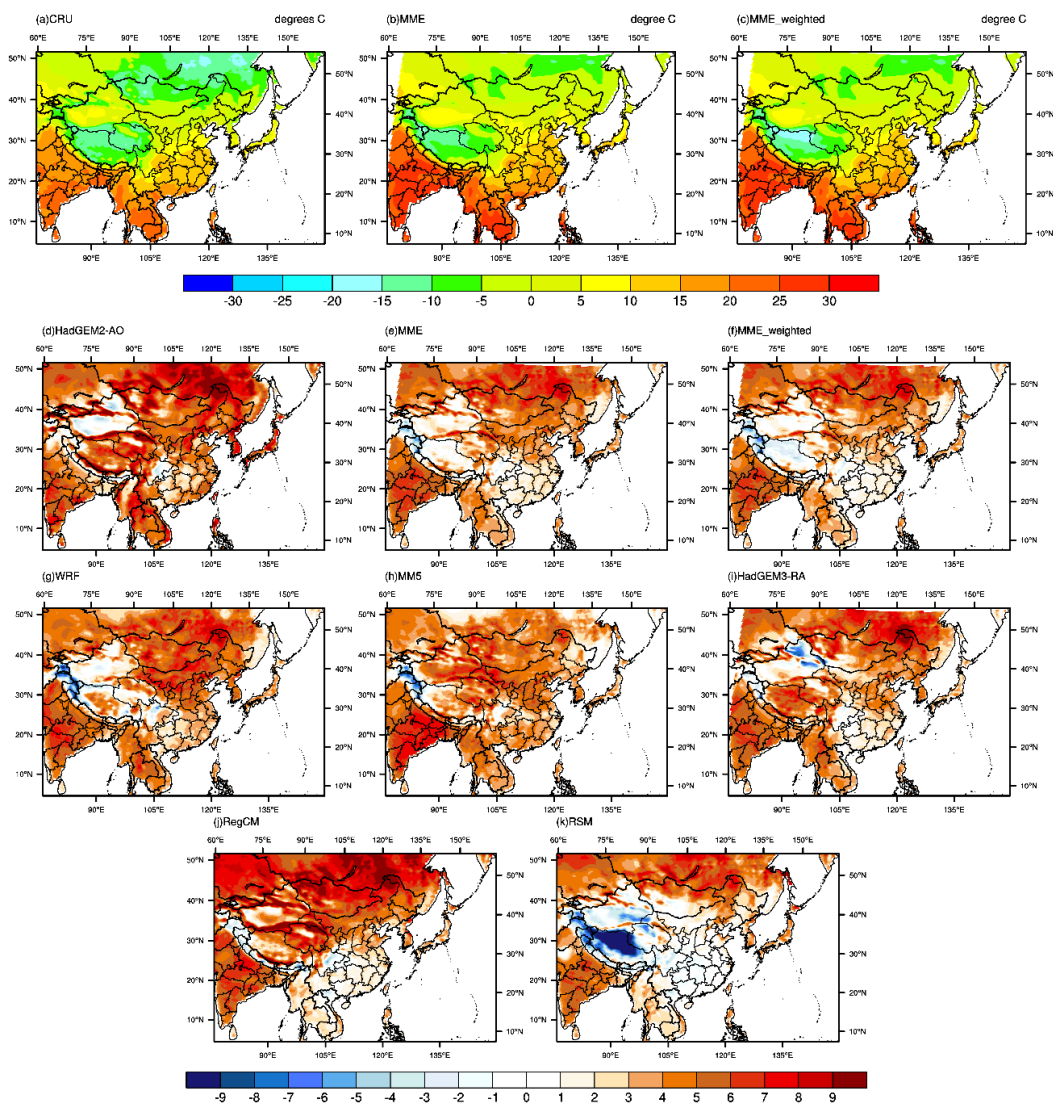

225

226 Figure 1. Spatial distributions of annual average temperature (°C) of CRU (a), multi-model  
 227 ensemble (b), multi-model ensemble (c), and temperature biases (°C) of the driving GCM  
 228 HadGEM2-AO (d), multi-RCM ensemble (e, f) and five RCMs (g-k) during 1980-2005.



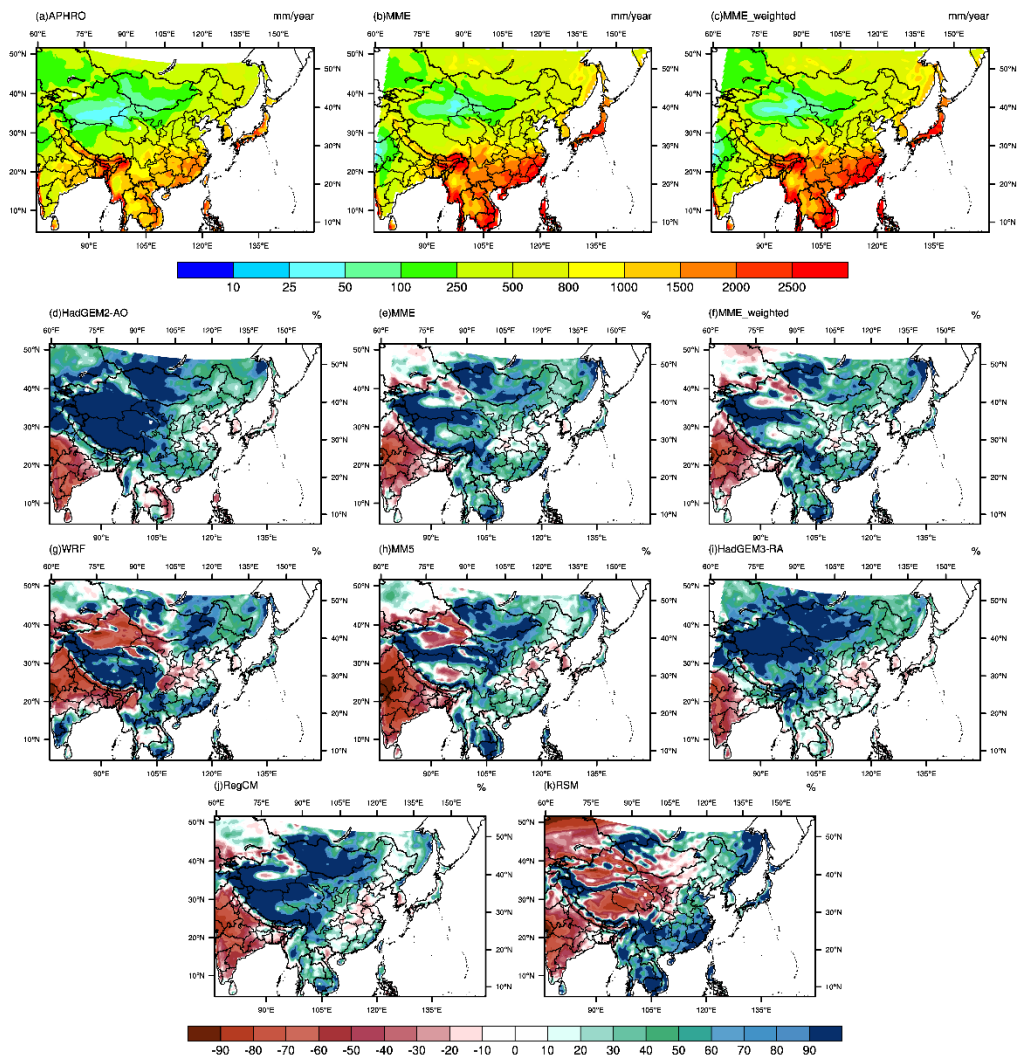

230

231 Figure 2. Spatial distributions of annual average precipitation (mm/year) of APHRO (a),  
 232 multi-model ensemble (b), weighted multi-model ensemble (c), and precipitation biases (%)  
 233 of the driving GCM HadGEM2-AO (d), multi-RCM ensemble (e and f) and five RCMs (g-k)  
 234 during 1980-2005.

235

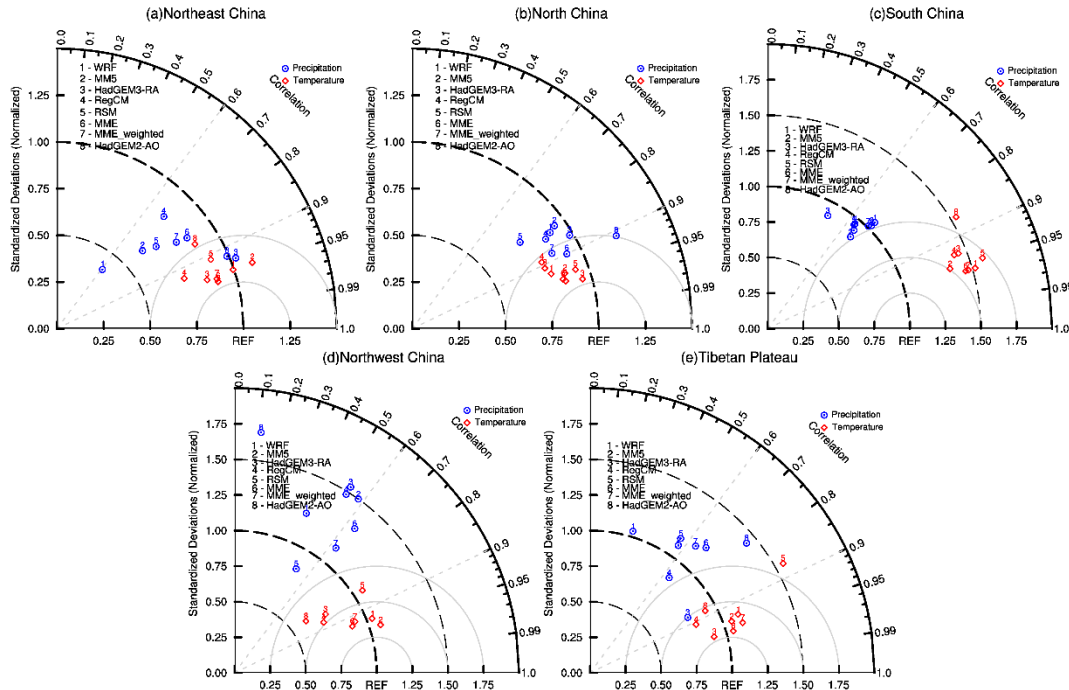

236

237 Figure 3. Taylor diagram to compare the skill of the models in representing the annual  
 238 average temperature and precipitation over the five regions of China, using the CRU (for  
 239 temperature) and APHRO (for precipitation) data as the REF.

240 (3) The abstract needs a careful revision. For example, how does the CORDEX-EA future  
 241 projection over China or East Asia differ from existing reports (e.g., IPCC AR5 report or at  
 242 least the driven GCM in this study)? Are the 5 models (RCMs) enough to quantify the model  
 243 variability? What is the added value for dynamical downscaling (e.g., how much error has  
 244 been reduced)?

245 Response: Thanks for your suggestion. We tried to compare and add the CORDEX-EA future  
 246 projection and the simulation by the driven GCM in the revision. Meanwhile, the added value  
 247 for dynamical downscaling was analyzed in the revised manuscript.

248 (1) The comparison of the CORDEX-EA future projection over China with the projection  
 249 by the driven GCM was added. As shown in table 3, increases in annual mean temperature  
 250 based on the five RCMs' ensemble range from 0.9 °C to 1.3 °C in different subregions, which  
 251 is quite close to the projected increase in annual mean temperature from the forcing GCM  
 252 (range from 0.7 °C to 1.4 °C). Meanwhile, similar spatial patterns for projected change in  
 253 annual mean temperature by the ensemble method and the driving GCM are shown in Figures  
 254 4a-b. Generally, the CORDEX-EA future projected change in mean temperature is nearly  
 255 consistent with the results from the driving GCM. However, opposite signals for projected  
 256 changes in average precipitation between the ensemble method and the driving GCM are  
 257 shown over South china, Northeast china and Tibetan Plateau (table 3). Particularly the spatial  
 258 and temporal differences in projection from two methods above are largest at the Tibetan  
 259 Plateau, up to about 10%.

260 Table 3. The future changes in average temperature (T; °C) and precipitation (P; %) for the  
 261 five subregions (as shown in Figure 1). The ensemble averages for each statistic are given in  
 262 the second line. The projections by the forcing GCM are given in the last line.

|                 |       | WRF   | MM5   | HadGEM3-RA | RegCM | RSM | Ensemble | HadGEM2-AO |
|-----------------|-------|-------|-------|------------|-------|-----|----------|------------|
| Northeast China | T(°C) | 0.2   | 2.7   | 1.4        | 1.4   | 1.1 | 1.3      | 0.8        |
|                 | P(%)  | -21.7 | 8.2   | 13.0       | 4.4   | 7.1 | 1.5      | -0.4       |
| North China     | T(°C) | 0.3   | 1.7   | 1.1        | 1.0   | 1.0 | 1.0      | 0.8        |
|                 | P(%)  | -1.5  | 15.1  | 3.1        | 10.2  | 3.3 | 6.1      | 4.9        |
| South China     | T(°C) | 0.5   | 1.5   | 1.0        | 0.8   | 0.8 | 0.9      | 0.7        |
|                 | P(%)  | -14.6 | -1.6  | 4.8        | 4.9   | 1.3 | -1.5     | 2.3        |
| Northwest China | T(°C) | 1.3   | 0.8   | 1.5        | 1.3   | 1.1 | 1.2      | 1.2        |
|                 | P(%)  | -27.0 | 19.4  | 2.2        | 4.7   | 8.9 | 3.6      | 7.2        |
| Tibetan Plateau | T(°C) | 0.9   | 1.4   | 1.2        | 1.3   | 1.6 | 1.3      | 1.4        |
|                 | P(%)  | -31.6 | -17.8 | 2.4        | 6.4   | 7.4 | -7.8     | 2.1        |

263

264 (2) The added values for RCMs were confirmed by comparing the performance of RCM  
 265 and GCM in reproducing annual mean precipitation and temperature during historical period.  
 266 According to the Taylor diagram (Figure 3 above), it is found that the added value for RCMs  
 267 strongly depends on the climate variable and the region of interest. The added value of the  
 268 RCMs with respect to the driving global climate model was evident in term of annual mean  
 269 temperature over all five subregions, with higher spatial correlation coefficient for all five  
 270 RCMs. Compared with the driving global climate model simulations, the spatial patterns of  
 271 the simulated annual average precipitation over South China, Northwest China and the  
 272 Tibetan Plateau were improved in most RCMs. The expectations are over Northeast China  
 273 and North China, where higher performance is shown for the driving global climate model.  
 274 Please see lines 288-299 in this response file for the reasons resulting in this phenomenon.

275 Besides, the results shown in above two points were summarized in a couple of  
 276 sentences in the revised abstract, in view of the length limit for the abstract.

277

278

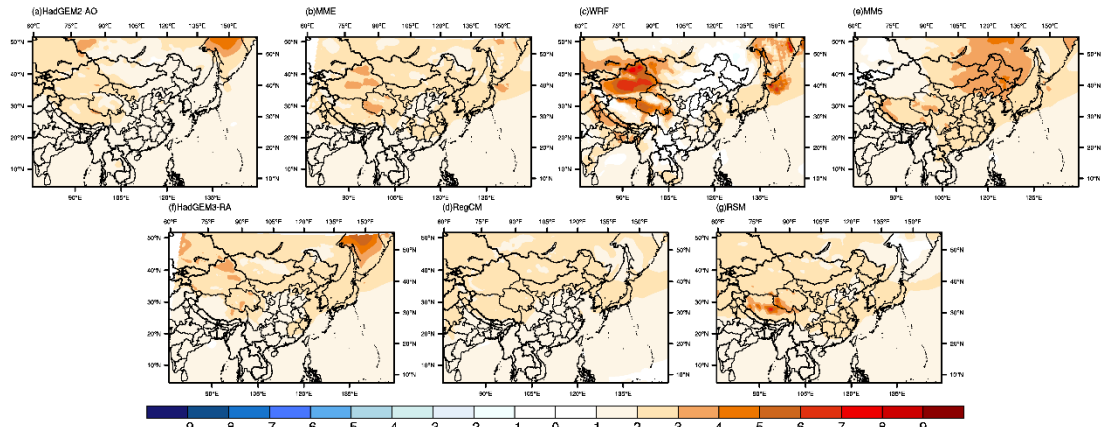

279

280 Figure 4. Projected future changes (RCP4.5-Baseline) in surface air temperature for the  
 281 forcing GCM HadGEM2-AO and each of the five RCMs.

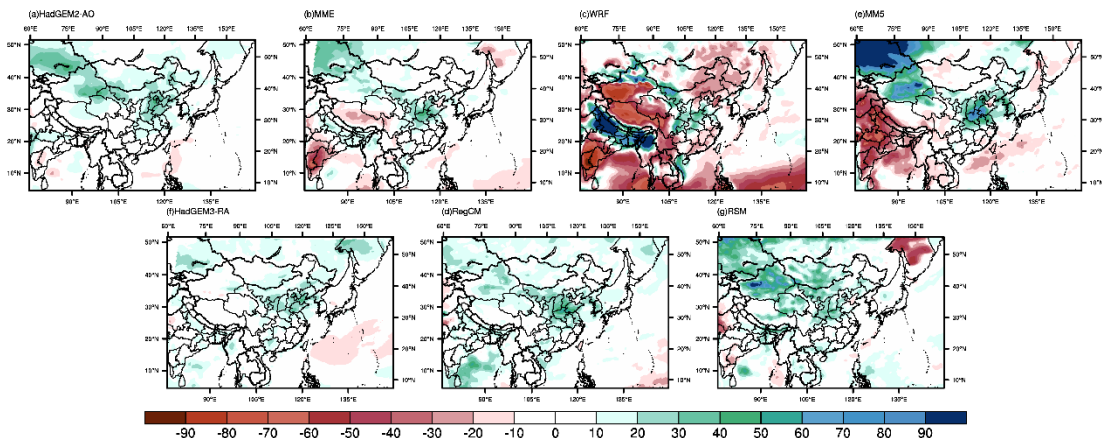

282

283 Figure 5. Projected future changes ((RCP4.5-Baseline)/Baseline x 100%) in precipitation for  
 284 the forcing GCM HadGEM2-AO and each of the five RCMs.

285

286 (4) Figure 4b. Why there is a decrease in precipitation correlation, where GCM outperforms  
 287 all RCMs over North China?

288 Response: Thanks. The reason why there is a decrease in precipitation correlation over North  
 289 China was added in the revision. In this study, it is found the performance of RCM in  
 290 reproducing spatial pattern of annual average precipitation is superior to that of the driving  
 291 GCM in term of correlation coefficient in most sub-regions over China. The only exception is  
 292 North China. In reality, the added value in RCM simulations (in compaction with GCM) is  
 293 related to a better representation of spatial variability of surface climate statistics, particularly  
 294 in regions with fine-scale surface forcing such as orographic and coastal features. Thus, the  
 295 added value in RCM simulations is commonly significant in regions with fine-scale surface  
 296 forcing, whereas the performance of RCM is less improved or even worse than that of the  
 297 driving GCM over relatively flat regions. For instance, Prommel and Geyer (Prömmel et al.,

298 2010) also found the RCM deteriorates some results compared to the driving GCM in  
299 relatively flat subregions surrounding the Alps, particularly during the summer season.

300 (5) There are a lot of grammar errors while I just mentioned quite a few below. Please  
301 proofread the paper carefully or ask a native English speaker for help.

302 Response: Sorry for the serious language problem in previous manuscript. In the revising  
303 process, two important co-authors (Prof. W. R. Peltier from University of Toronto, Toronto,  
304 Canada and Prof. Guiling Wang from University of Connecticut, USA) with proficient  
305 English skills contributed to the thorough control check in language for this version  
306 significantly. As you can see from the track-changes in the main context, tables, and figures,  
307 the revised version was really undergone a major revision through which the paper quality  
308 has been improved.

309

### 310 **Minor comments**

311 (6) P3, Section 2.1. Two datasets were used as reference precipitation, CRU and APHRO.  
312 The reason why both datasets are necessary is equivocal, partly because of little comparison  
313 between them. Which one was chosen as reference value when calculating precipitation  
314 biases (%) in Figure 3 and why?

315 Response: Thanks for your suggestions. In figure 3 APHRO data was chosen as reference  
316 precipitation when calculating precipitation biases (%). Meanwhile, only APHRO dataset  
317 other than CRU dataset was used as reference precipitation in the revision, to increase the  
318 readability of this paper. The reason why APHRO dataset is used has been detailed in lines  
319 40-53 in this response file.

320 (7) P1, L16, “decreases -7.8%” -> “decreases by -7.8%”.

321 Response: Thanks. They have been done.

322 (8) P1, L20, “contribute” -> “contributes”.

323 Response: Thanks. They have been done.

324 (9) P1, L21, “which” -> “where”.

325 Response: Thanks. They have been done.

326 (10) P2, L22, “forces on” -> “focusing on”.

327 Response: Thanks. They have been done.

328 (11) P2, L24-27, this sentence is awkward.

329 Response: Thanks. We rewrote this sentence.

330 (12) P2, L32, “simulating”->”simulation”

331 **Response: Thanks. They have been done.**

332 (13) P3, L2, “will became”->”will become”

333 **Response: Thanks. They have been done.**

334 (14) P3, L13, “Scection 3” ->“Section 3”.

335 **Response: Thanks. They have been done.**

336 (15) P4, L1, “include” -> “including”, “.. of each of the RCM: : :” -> “of each RCM : : :”.

337 **Response: Thanks. They have been done.**

338 (16) Several sentences in the manuscript are difficult to read with grammar mistakes, for  
339 instance, P2 L2, P2 L7-L8, P3 L1, P3 L19-21, etc. The authors should improve the  
340 presentation, especially for Abstract and Introduction Section.

341 **Response: Thanks. We rewrote these sentences.**

342 (17) Caption of Figure 4 needs revision, where the information for temperature (red  
343 rectangles) is missing.

344 **Response: Thanks. We modified this caption in the revised manuscript.**

345

346

## References:

- 347 Baker, N.C. and Taylor, P.C.: A Framework for Evaluating Climate Model Performance Metrics.  
348 *Journal of Climate*, 29, 1773-1782, doi: 10.1175/JCLI-D-15-0114.1, 2016
- 349 Becker, A., Finger, P. and Meyer-Christoffer, A. et al.: A description of the global land-surface  
350 precipitation data products of the Global Precipitation Climatology Centre with sample  
351 applications including centennial (trend) analysis from 1901 to present. *Earth System Science*  
352 *Data*, 5, 71-99, doi: 10.5194/essd-5-71-2013, 2013
- 353 Cha, D. and Lee, D.: Reduction of systematic errors in regional climate simulations of the summer  
354 monsoon over East Asia and the western North Pacific by applying the spectral nudging technique.  
355 *Journal of Geophysical Research: Atmospheres*, 114, D14108, doi: 10.1029/2008JD011176, 2009
- 356 Cha, D., Jin, C. and Lee, D. et al.: Impact of intermittent spectral nudging on regional climate  
357 simulation using Weather Research and Forecasting model. *Journal of Geophysical Research:*  
358 *Atmospheres*, 116, D10103, doi: 10.1029/2010JD015069, 2011
- 359 Davies, T., Cullen, M.J.P. and Malcolm, A.J. et al.: A new dynamical core for the Met Office's global  
360 and regional modelling of the atmosphere. *Quarterly Journal of the Royal Meteorological Society*,  
361 131, 1759-1782, doi: 10.1256/qj.04.101, 2005
- 362 Diallo, I., Sylla, M.B. and Giorgi, F. et al.: Multimodel GCM-RCM Ensemble-Based Projections of  
363 Temperature and Precipitation over West Africa for the Early 21st Century. *International Journal*  
364 *of Geophysics*, 2012, Article ID 972896, doi: 10.1155/2012/972896, 2012
- 365 Dong, N.D., Jayakumar, K.V. and Agilan, V.: Impact of Climate Change on Flood Frequency of the  
366 Triam Reservoir in Vietnam Using RCMS. *Journal of Hydrologic Engineering*, 23, 05017032, doi:  
367 10.1061/(ASCE)HE.1943-5584.0001609, 2018
- 368 Gao, J., Hou, W. and Xue, Y. et al.: Validating the dynamic downscaling ability of WRF for East Asian  
369 summer climate. *Theoretical and Applied Climatology*, 128, 241-253, doi:  
370 10.1007/s00704-015-1710-9, 2017
- 371 Giorgi, F., Coppola, E. and Solmon, F. et al.: RegCM4: model description and preliminary tests over  
372 multiple CORDEX domains. *Climate Research*, 52, 7-29, doi: 10.3354/cr01018, 2012
- 373 Hong, S. and Yang, Y.: Implications of a Decadal Climate Shift over East Asia in Winter: A  
374 Modeling Study. *Journal of Climate*, 23, 4989-5001, doi: 10.1175/2010JCLI3637.1, 2010
- 375 Hong, S., Park, H. and Cheong, H. et al.: The Global/Regional Integrated Model system (GRIMs).  
376 *Asia-Pacific Journal of Atmospheric Sciences*, 49, 219-243, doi: 10.1007/s13143-013-0023-0,  
377 2013
- 378 Huang, D. and Gao, S.: Impact of different cumulus convective parameterization schemes on the  
379 simulation of precipitation over China. *Tellus A: Dynamic Meteorology and Oceanography*, 69,  
380 1406264, doi: 10.1080/16000870.2017.1406264, 2017
- 381 Huttunen, J.M.J., Räisänen, J. and Nissinen, A. et al.: Cross-validation analysis of bias models in  
382 Bayesian multi-model projections of climate. *Climate Dynamics*, 48, 1555-1570, doi:  
383 10.1007/s00382-016-3160-1, 2017
- 384 Jin, C., Cha, D. and Lee, D. et al.: Evaluation of climatological tropical cyclone activity over the  
385 western North Pacific in the CORDEX-East Asia multi-RCM simulations. *Climate Dynamics*, 47,  
386 765-778, doi: 10.1007/s00382-015-2869-6, 2016

387 Kharin, V.V. and Zwiers, F.W.: Climate Predictions with Multimodel Ensembles. *Journal of Climate*,  
388 15, 793-799, doi: 10.1175/1520-0442(2002)015<0793:CPWME>2.0.CO;2, 2002

389 Kumar, D. and Dimri, A.P.: Regional climate projections for Northeast India: an appraisal from  
390 CORDEX South Asia experiment. *Theoretical and Applied Climatology*, doi:  
391 10.1007/s00704-017-2318-z, 2017

392 Lau, W.K.M., Kim, K. and Ruby Leung, L.: Changing circulation structure and precipitation  
393 characteristics in Asian monsoon regions: greenhouse warming vs. aerosol effects. *Geoscience*  
394 *Letters*, 4, 28, doi: 10.1186/s40562-017-0094-3, 2017

395 Lee, D., Min, S. and Jin, J. et al.: Thermodynamic and dynamic contributions to future changes in  
396 summer precipitation over Northeast Asia and Korea: a multi-RCM study. *Climate Dynamics*, 49,  
397 4121-4139, doi: 10.1007/s00382-017-3566-4, 2017

398 Lee, J., Hong, S. and Chang, E. et al.: Assessment of future climate change over East Asia due to the  
399 RCP scenarios downscaled by GRIMs-RMP. *Climate Dynamics*, 42, 733-747, doi:  
400 10.1007/s00382-013-1841-6, 2014

401 New, M.G., Hulme, M. and Jones, P.D.: Representing Twentieth-Century Space - Time Climate  
402 Variability. Part II: Development of 1901 - 96 Monthly Grids of Terrestrial Surface Climate.  
403 *Journal of Climate*, 13, 2217-2238, doi: 10.1175/1520-0442(2000)013<2217:RTCSTC>2.0.CO;2,  
404 2000

405 Niu, X., Wang, S. and Tang, J. et al.: Multimodel ensemble projection of precipitation in eastern China  
406 under A1B emission scenario. *Journal of Geophysical Research: Atmospheres*, 120, 9965-9980,  
407 doi: 10.1002/2015JD023853, 2015

408 Park, C., Min, S. and Lee, D. et al.: Evaluation of multiple regional climate models for summer climate  
409 extremes over East Asia. *Climate Dynamics*, 46, 2469 - 2486, doi: 10.1007/s00382-015-2713-z,  
410 2016

411 Park, E.H., Hong, S.Y. and Kang, H.S.: Characteristics of an East - Asian summer monsoon  
412 climatology simulated by the RegCM3. *Meteorology and Atmospheric Physics*, 100, 139-158, doi:  
413 10.1007/s00703-008-0300-0, 2008

414 Prömmel, K., Geyer, B. and Jones, J.M. et al.: Evaluation of the skill and added value of a  
415 reanalysis-driven regional simulation for Alpine temperature. *International Journal of Climatology*,  
416 30, 760-773, doi: 10.1002/joc.1916, 2010

417 Rozante, J.R., Moreira, D.S. and Godoy, R.C.M. et al.: Multi-model ensemble: technique and  
418 validation. *Geoscientific Model Development*, 7, 2333-2343, doi: 10.5194/gmd-7-2333-2014,  
419 2014

420 Saini, R., Wang, G. and Yu, M. et al.: Comparison of RCM and GCM projections of boreal summer  
421 precipitation over Africa. *Journal of Geophysical Research: Atmospheres*, 120, 3679-3699, doi:  
422 10.1002/2014JD022599, 2015

423 Skamarock, W.C., Klemp, J.B. and Dudhia, J. et al.: A Description of the Advanced Research WRF  
424 Version 2, 2005.

425 Sun, Q., Miao, C. and Duan, Q. et al.: Would the 'real' observed dataset stand up? A critical  
426 examination of eight observed gridded climate datasets for China. *Environmental Research Letters*,  
427 9, 015001, doi: 10.1088/1748-9326/9/1/015001, 2014



428 Sun, Q., Miao, C. and Duan, Q.: Projected changes in temperature and precipitation in ten river basins  
429 over China in 21st century. *International Journal of Climatology*, 35, 1125-1141, doi:  
430 10.1002/joc.4043, 2015

431 Tang, J., Li, Q. and Wang, S. et al.: Building Asian climate change scenario by multi-regional climate  
432 models ensemble. Part I: surface air temperature. *International Journal of Climatology*, 36,  
433 4241-4252, doi: 10.1002/joc.4628, 2016

434 Taylor, K.E.: Summarizing multiple aspects of model performance in a single diagram. *Journal of*  
435 *Geophysical Research: Atmospheres*, 106, 7183-7192, doi: 10.1029/2000JD900719, 2001

436 Um, M., Kim, Y. and Kim, J.: Evaluating historical drought characteristics simulated in CORDEX East  
437 Asia against observations. *International Journal of Climatology*, 37, 4643-4655, doi:  
438 10.1002/joc.5112, 2017

439 Wang, L., Chen, W. and Huang, G. et al.: Changes of the transitional climate zone in East Asia: past  
440 and future. *Climate Dynamics*, 49, 1463-1477, doi: 10.1007/s00382-016-3400-4, 2017

441 Willmott, C.J. and Matsuura, K.: *Terrestrial Air Temperature and Precipitation: Monthly and Annual*  
442 *Time Series (1950 - 1999)*, 2001.

443 Wu, J. and Gao, X.: A gridded daily observation dataset over China region and comparison with the  
444 other datasets. *Chinese Journal of Geophysics*. (in Chinese), 56, 1102-1111, doi:  
445 10.6038/cjg20130406, 2013

446 Xie, P., Yatagai, A. and Chen, M. et al.: A Gauge-Based Analysis of Daily Precipitation over East Asia.  
447 *Journal of Hydrometeorology*, 8, 607-626, doi: 10.1175/JHM583.1, 2007

448 Yatagai, A., Kamiguchi, K. and Arakawa, O. et al.: APHRODITE: Constructing a Long-Term Daily  
449 Gridded Precipitation Dataset for Asia Based on a Dense Network of Rain Gauges. *Bulletin of the*  
450 *American Meteorological Society*, 93, 1401-1415, doi: 10.1175/BAMS-D-11-00122.1, 2012

451 Yhang, Y. and Hong, S.: Improved Physical Processes in a Regional Climate Model and Their Impact  
452 on the Simulated Summer Monsoon Circulations over East Asia. *Journal of Climate*, 21, 963-979,  
453 doi: 10.1175/2007JCLI1694.1, 2008

454 Yin, H., Donat, M.G. and Alexander, L.V. et al.: Multi-dataset comparison of gridded observed  
455 temperature and precipitation extremes over China. *International Journal of Climatology*, 35,  
456 2809-2827, doi: 10.1002/joc.4174, 2015

457 Zhao, W. and Li, A.: A Review on Land Surface Processes Modelling over Complex Terrain.  
458 *Advances in Meteorology*, 2015, Article ID 607181, doi: 10.1155/2015/607181, 2015

459
